# Supplementary material for: Novel Meta-Diamide Compounds Containing Sulfide Derivatives Were Designed and Synthesized as Potential Pesticides
Source: MDPI journal article supplement (doi:10.3390/molecules29061337), 2024-03-17
Supplement: s1 [file s1]

# Molecules

MATERIAL SUPPLEMENTAR  
For

## Novel Meta-Diamide Compounds Containing Sulfide Derivatives Were Designed and Synthesized as Potential Pesticides

Jingwen Wu <sup>1</sup>, Shuaihui Dang <sup>1</sup>, Yan Zhang <sup>1,\*</sup> and Sha Zhou <sup>2</sup>

<sup>1</sup> College of Resources and Environmental Engineering, Shanghai Polytechnic University, Shanghai 201209, China; 20221516055@stu.sspu.edu.cn (J.W.); 20221516008@stu.sspu.edu.cn (S.D.)

<sup>2</sup> Collaborative Innovation Center of Zhejiang Green Pesticide, National Joint Local Engineering Laboratory for High-Efficient Preparation of Biopesticide, School of Forestry and Biotechnology, Zhejiang A & F University, Hangzhou 311300, China; 15822308335@163.com

\* Correspondence: yzhang@sspu.edu.cn; Tel.: +86-15902144815

<sup>1</sup>H NMR, <sup>13</sup>C NMR and HRMS spectra for target compounds

## Table of contents

|                                                                                  |    |
|----------------------------------------------------------------------------------|----|
| 1. $^1\text{H}$ NMR, $^{13}\text{C}$ NMR and HRMS spectra for compound A-1.....  | 2  |
| 2. $^1\text{H}$ NMR, $^{13}\text{C}$ NMR and HRMS spectra for compound A-2.....  | 3  |
| 3. $^1\text{H}$ NMR, $^{13}\text{C}$ NMR and HRMS spectra for compound A-3.....  | 5  |
| 4. $^1\text{H}$ NMR, $^{13}\text{C}$ NMR and HRMS spectra for compound B-1.....  | 6  |
| 5. $^1\text{H}$ NMR, $^{13}\text{C}$ NMR and HRMS spectra for compound B-2.....  | 8  |
| 6. $^1\text{H}$ NMR, $^{13}\text{C}$ NMR and HRMS spectra for compound B-3.....  | 9  |
| 7. $^1\text{H}$ NMR, $^{13}\text{C}$ NMR and HRMS spectra for compound B-4.....  | 11 |
| 8. $^1\text{H}$ NMR, $^{13}\text{C}$ NMR and HRMS spectra for compound C-1.....  | 12 |
| 9. $^1\text{H}$ NMR, $^{13}\text{C}$ NMR and HRMS spectra for compound C-2.....  | 14 |
| 10. $^1\text{H}$ NMR, $^{13}\text{C}$ NMR and HRMS spectra for compound C-3..... | 15 |
| 11. $^1\text{H}$ NMR, $^{13}\text{C}$ NMR and HRMS spectra for compound D-1..... | 17 |
| 12. $^1\text{H}$ NMR, $^{13}\text{C}$ NMR and HRMS spectra for compound D-2..... | 18 |

A-1

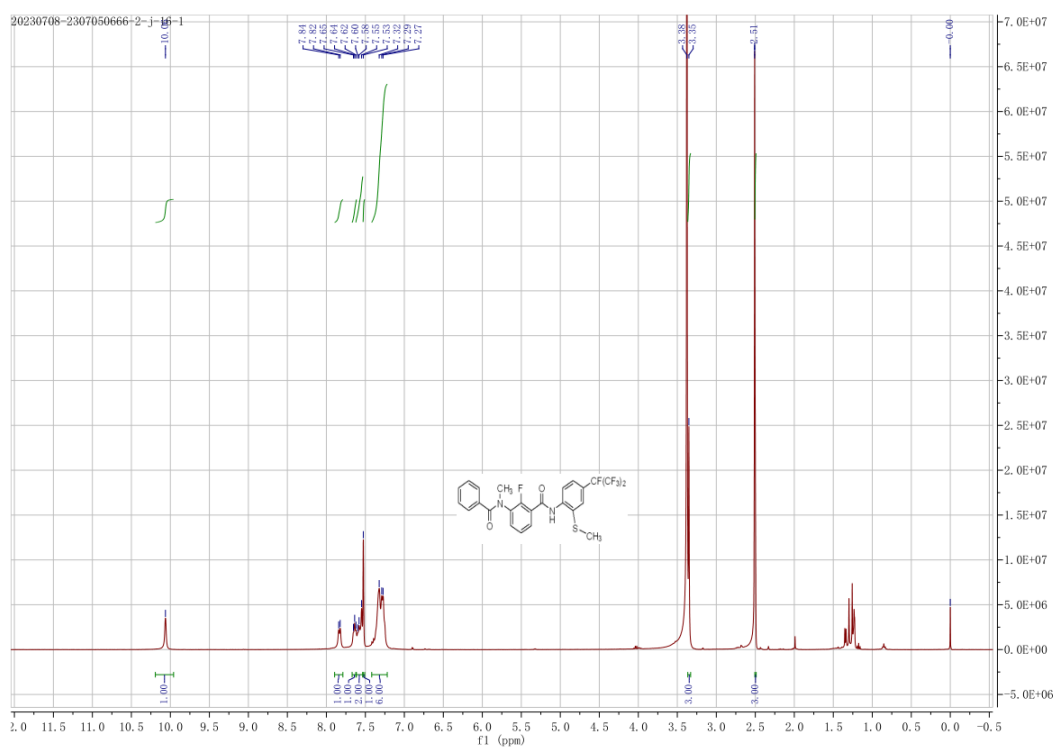

Figure 1S  $^1\text{H}$  NMR spectrum of A-1

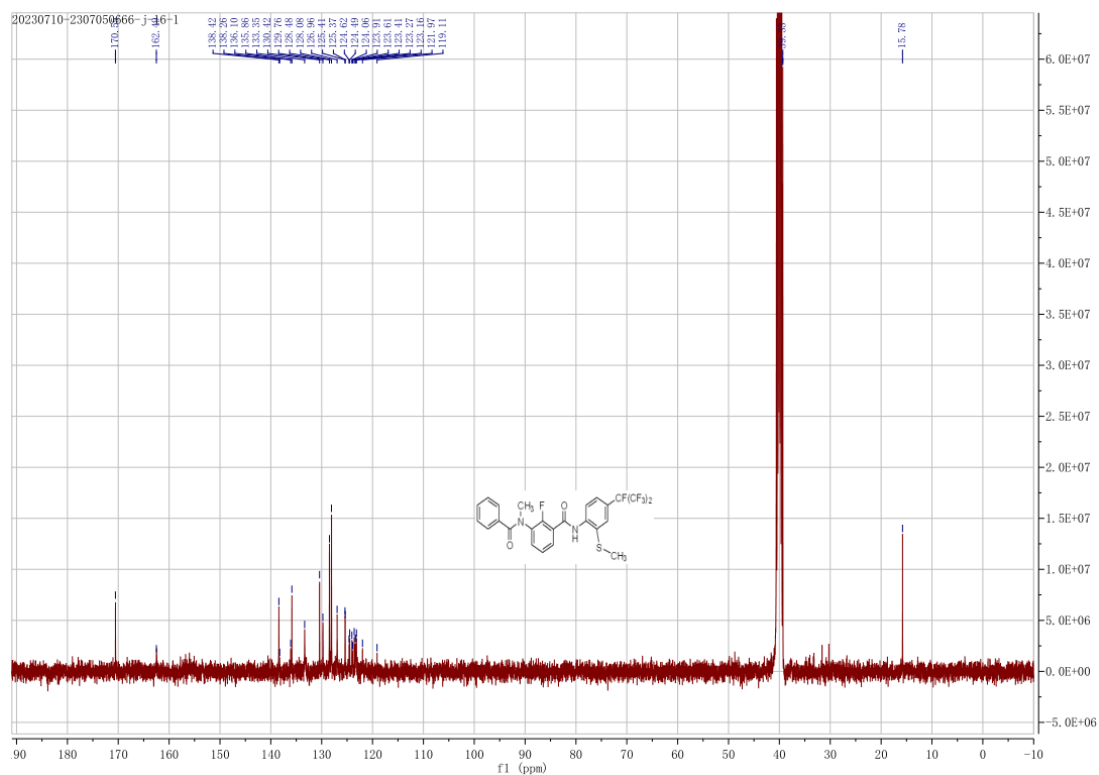

Figure 2S  $^{13}\text{C}$  NMR spectrum of A-1

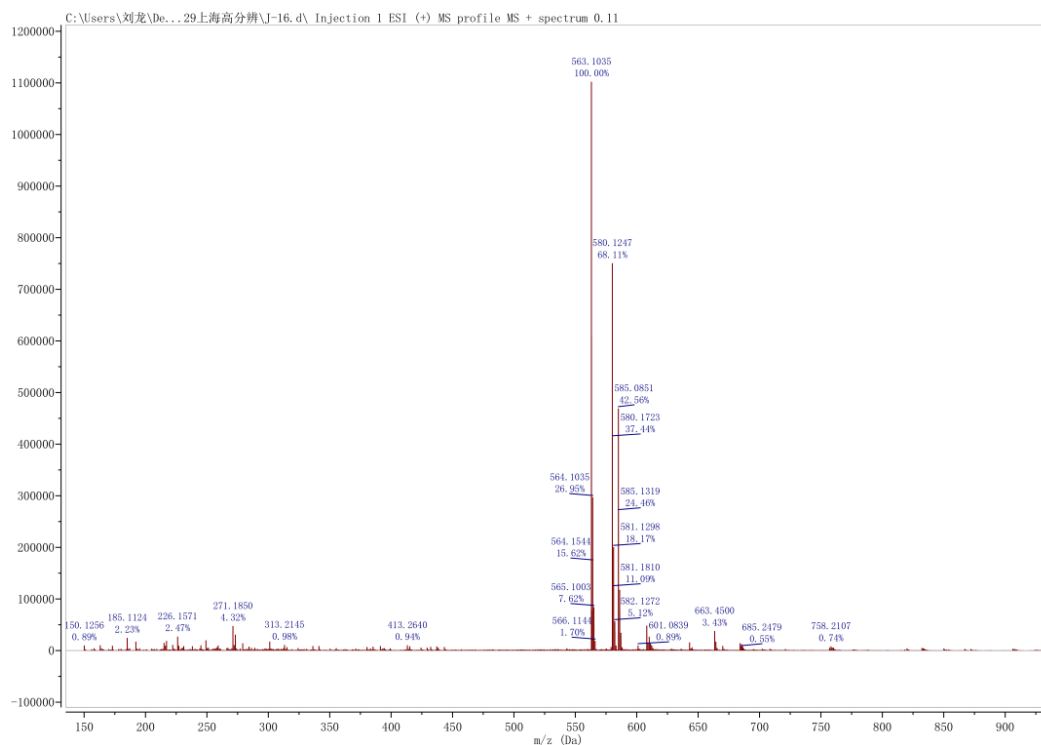

**Figure 3S** HRMS spectrum of **A-1**

**A-2**

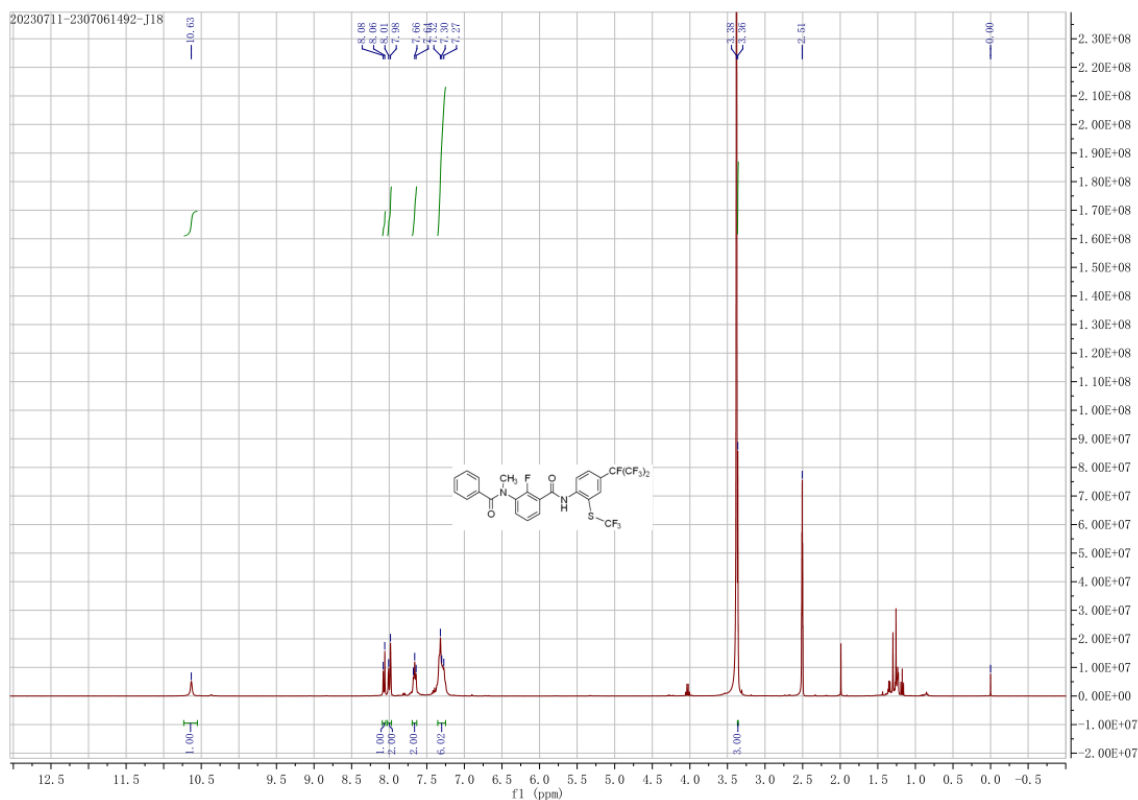

**Figure 4S**  $^1\text{H}$  NMR spectrum of **A-2**

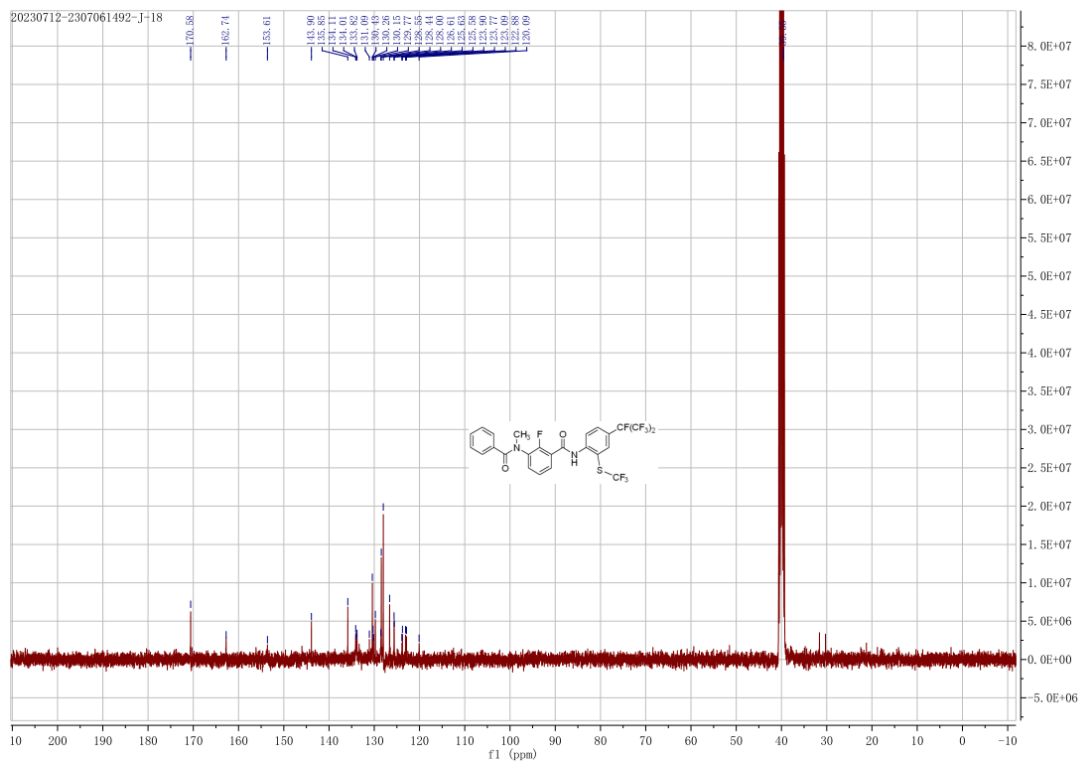

Figure 5S  $^{13}\text{C}$  NMR spectrum of A-2

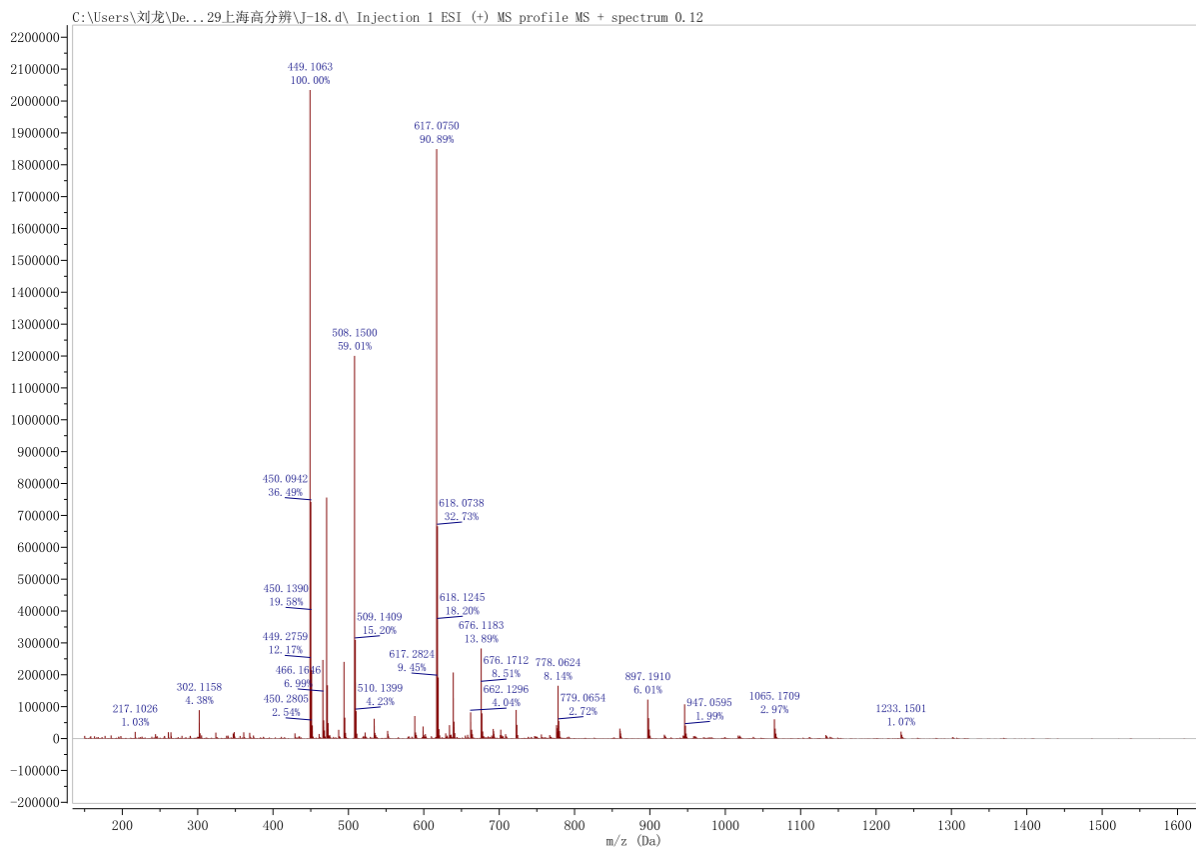

Figure 6S HRMS spectrum of A-2

**A-3**

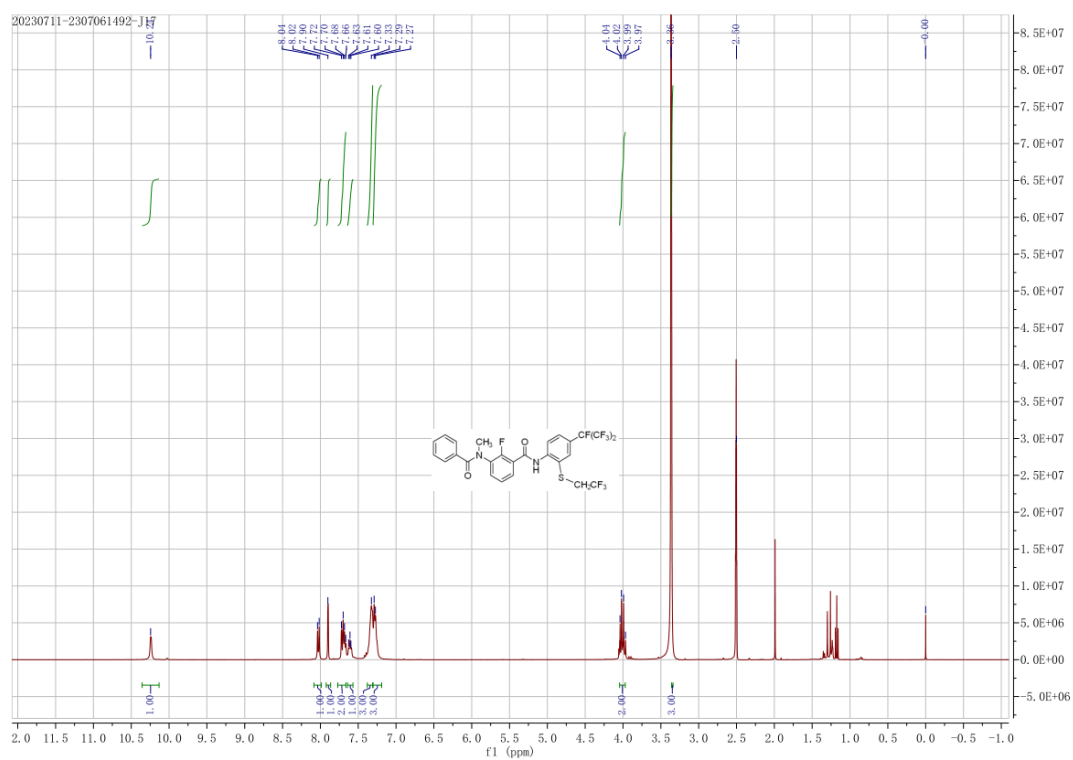

**Figure 7S**  $^1\text{H}$  NMR spectrum of A-3

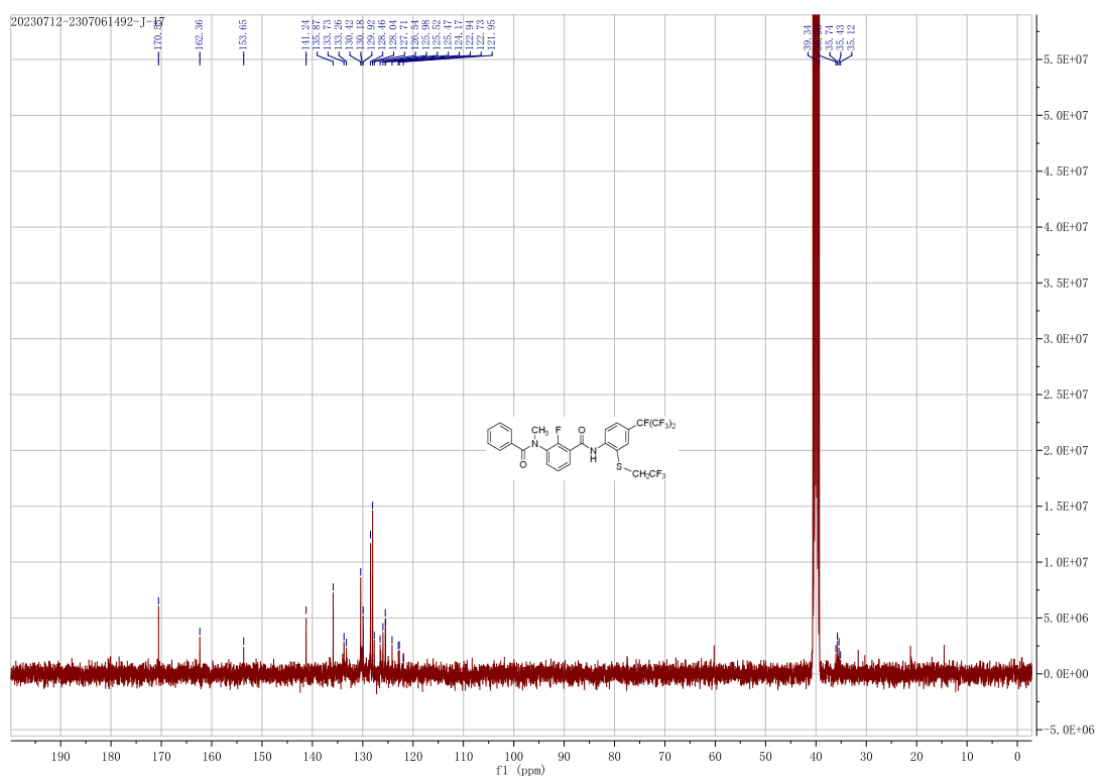

**Figure 8S**  $^{13}\text{C}$  NMR spectrum of A-3

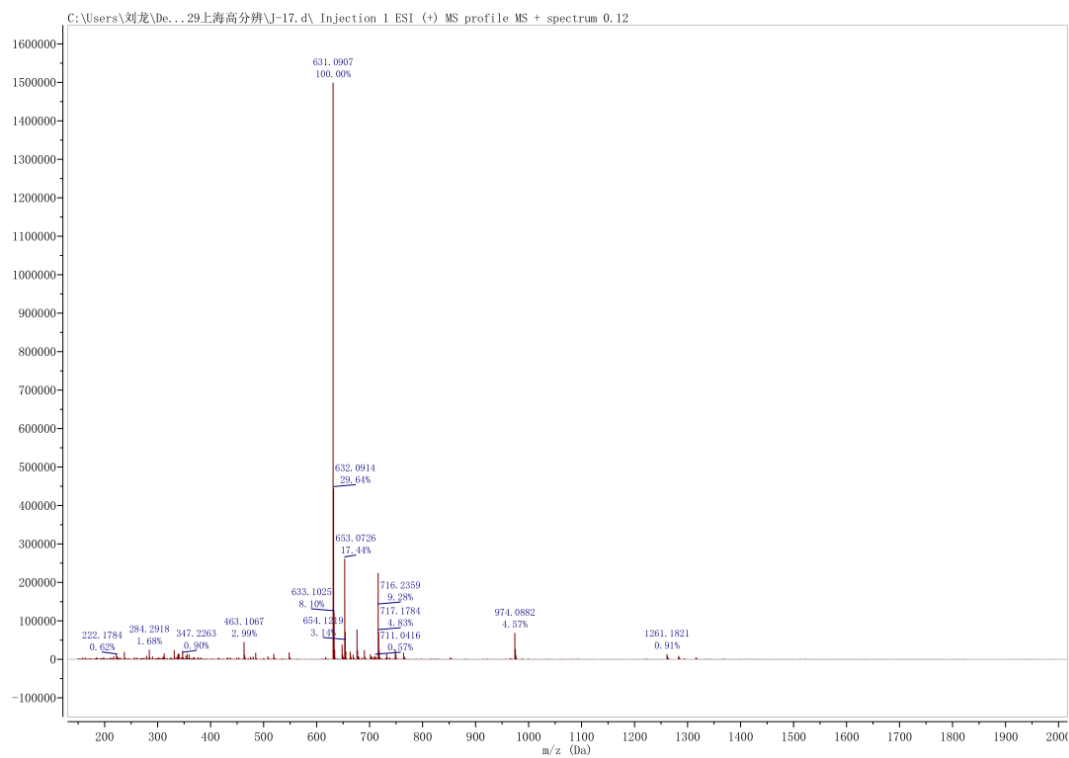

**Figure 9S** HRMS spectrum of **A-3**

**B-1**

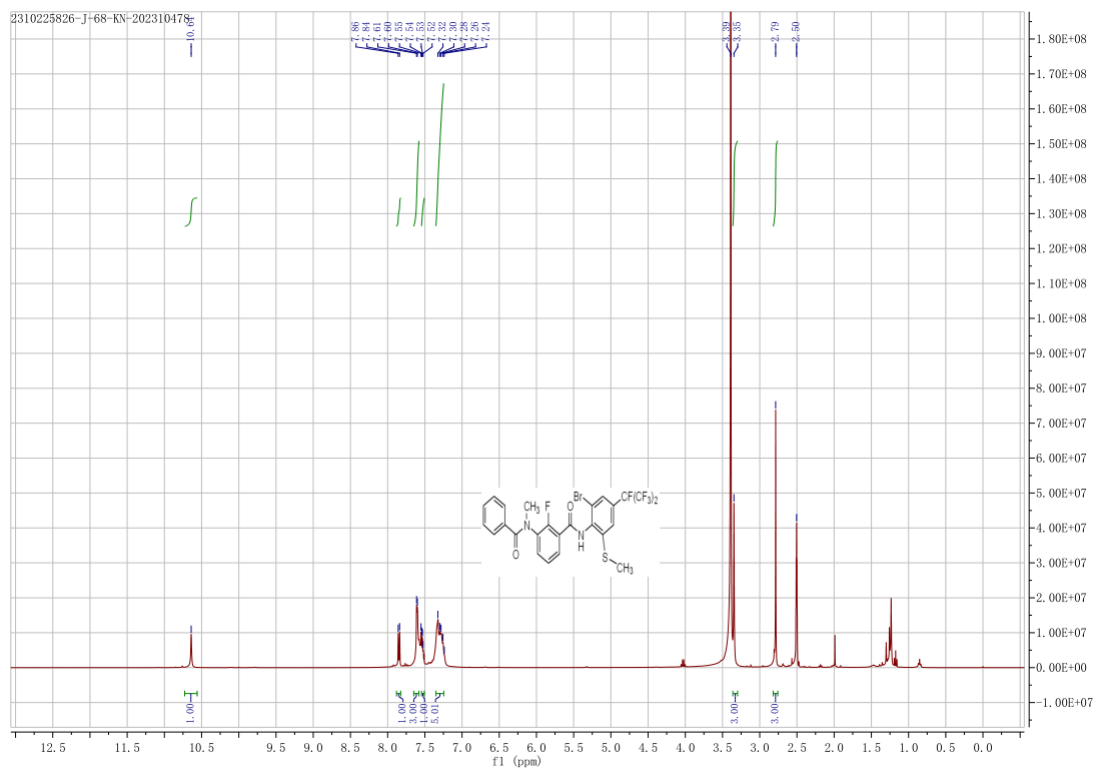

**Figure 10S**  $^1\text{H}$  NMR spectrum of **B-1**

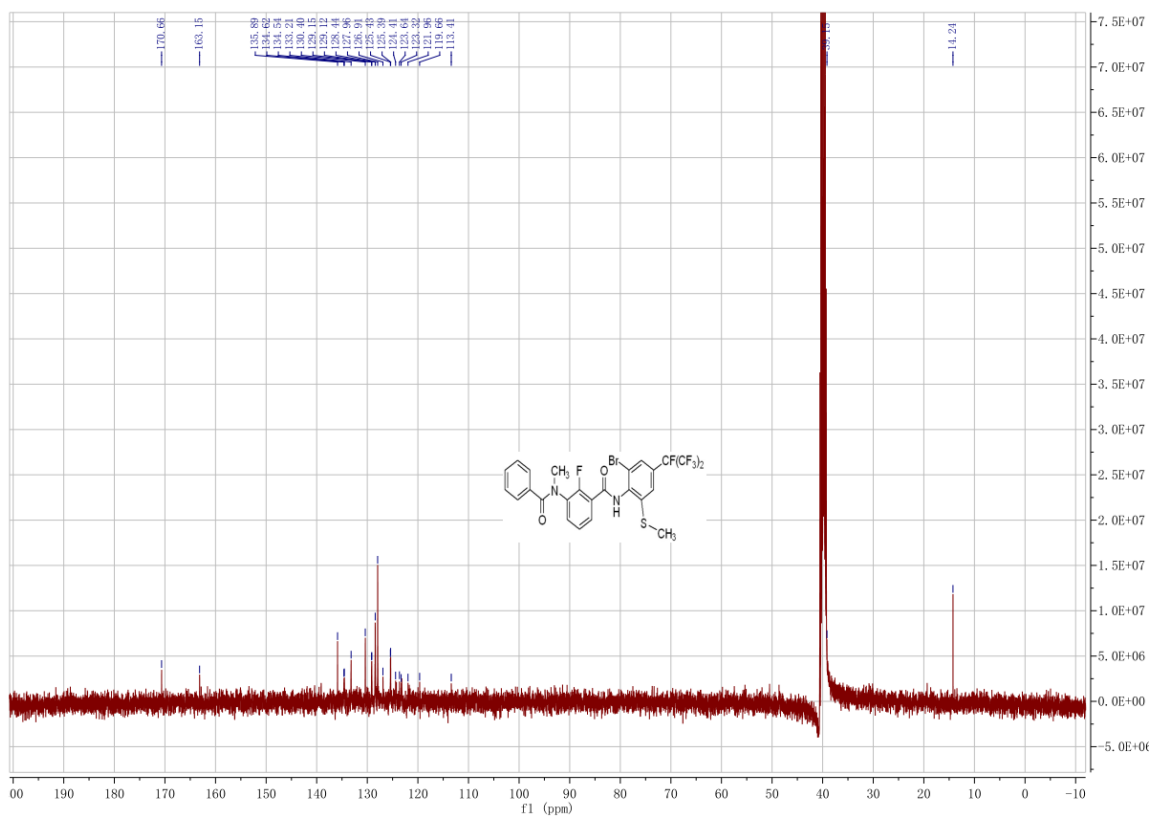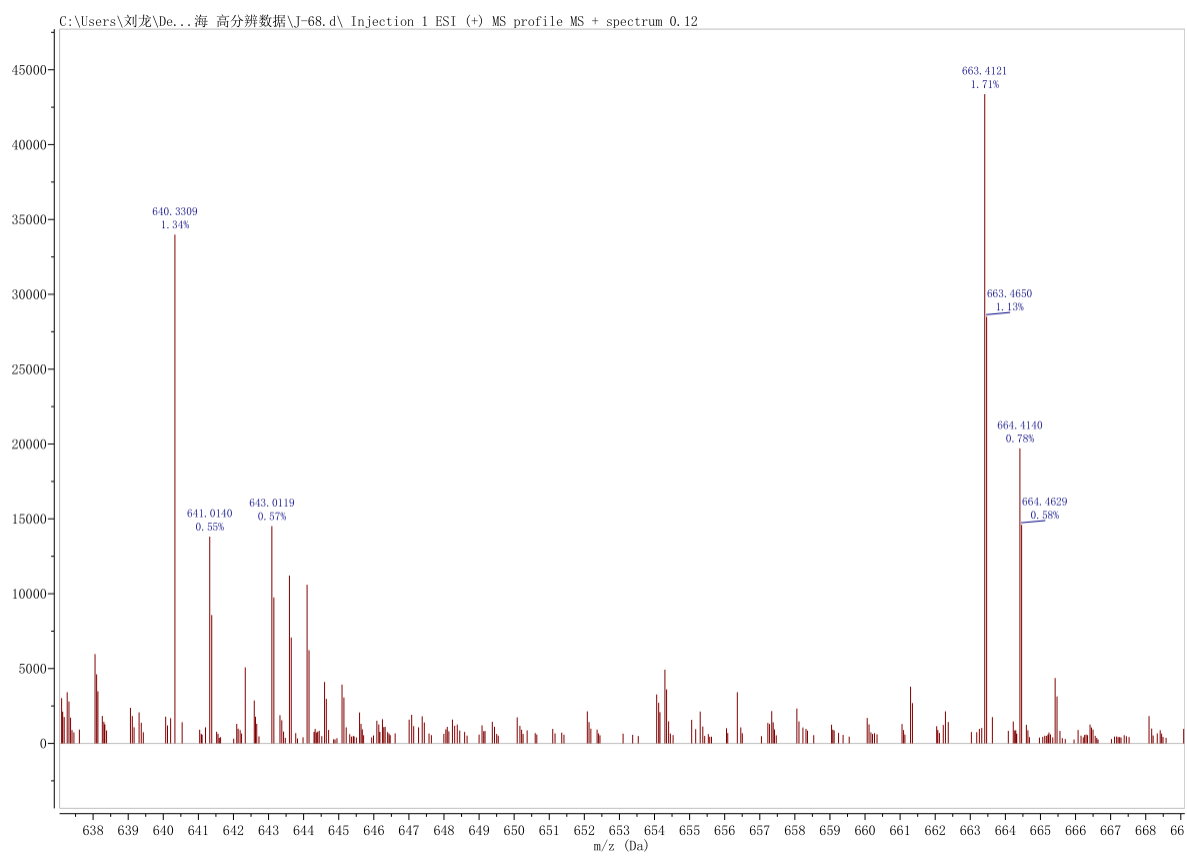

**B-2**

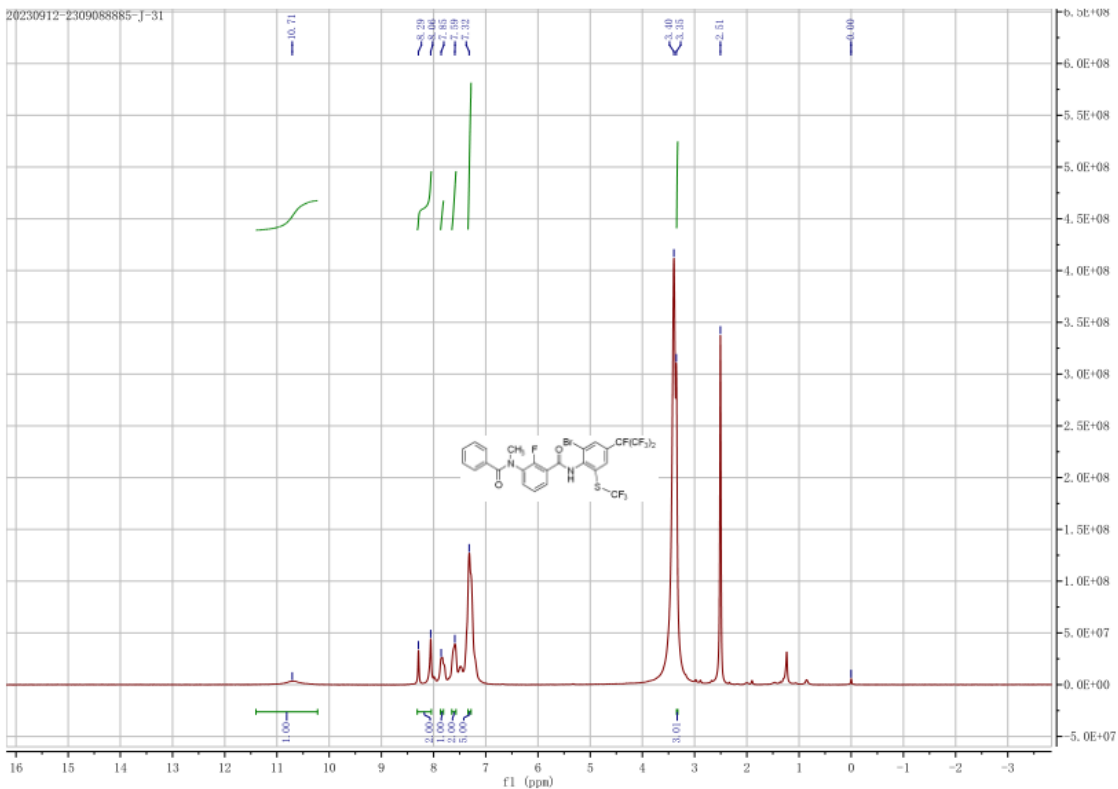

**Figure 13S**  $^1\text{H}$  NMR spectrum of **B-2**

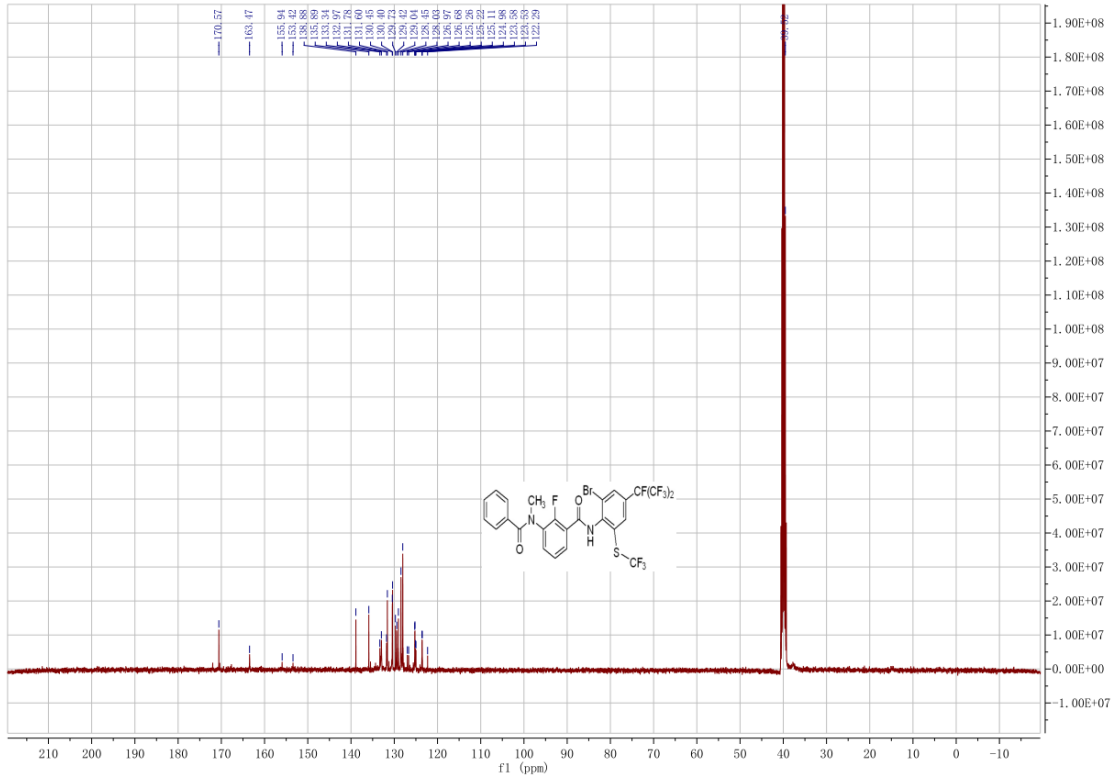

**Figure 14S**  $^{13}\text{C}$  NMR spectrum of **B-2**

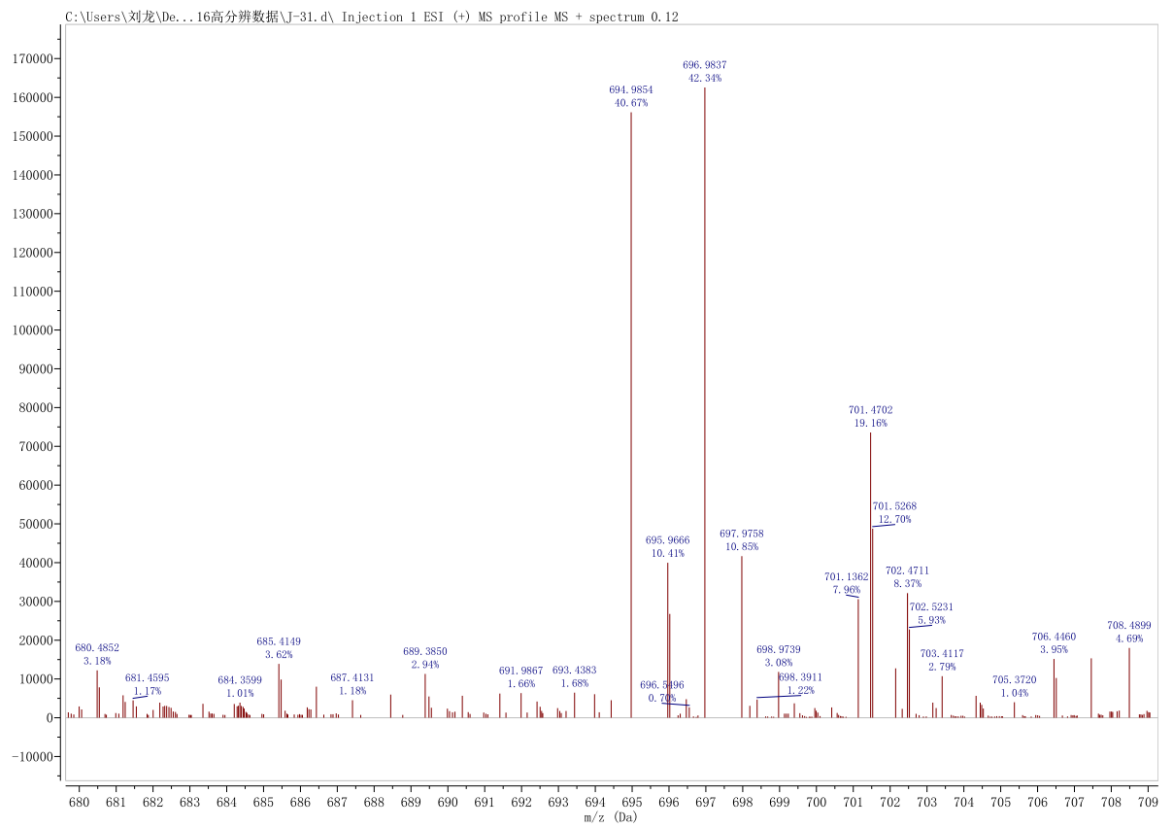

**Figure 15S** HRMS spectrum of **B-2**

**B-3**

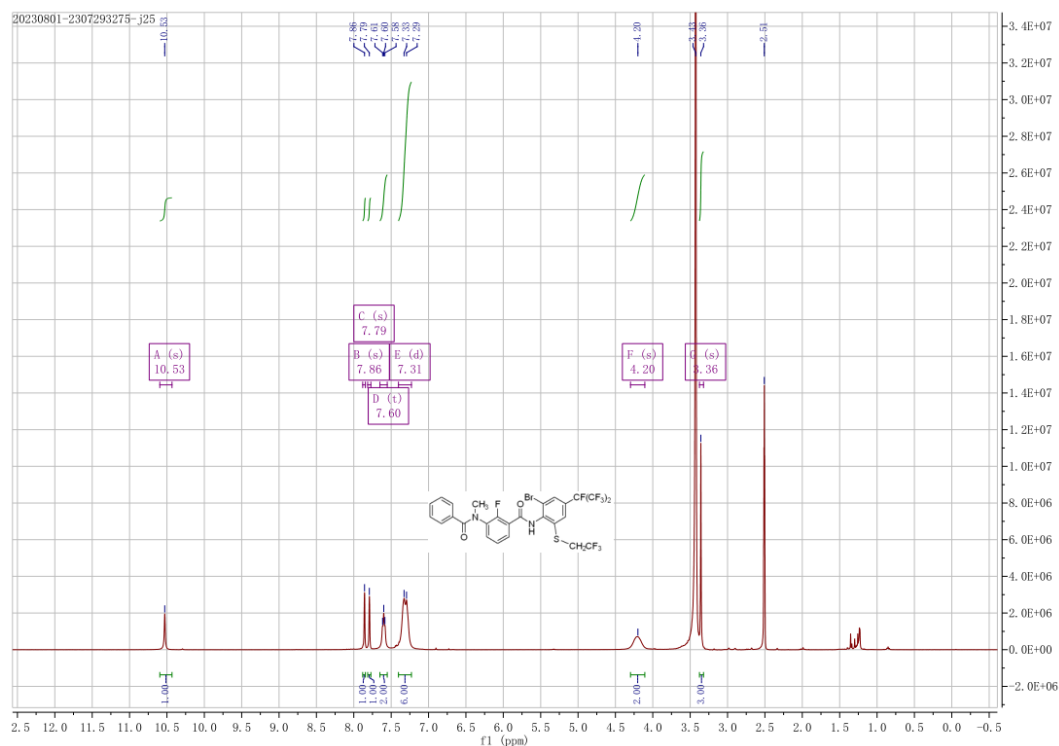

**Figure 16S**  $^1\text{H}$  NMR spectrum of **B-3**

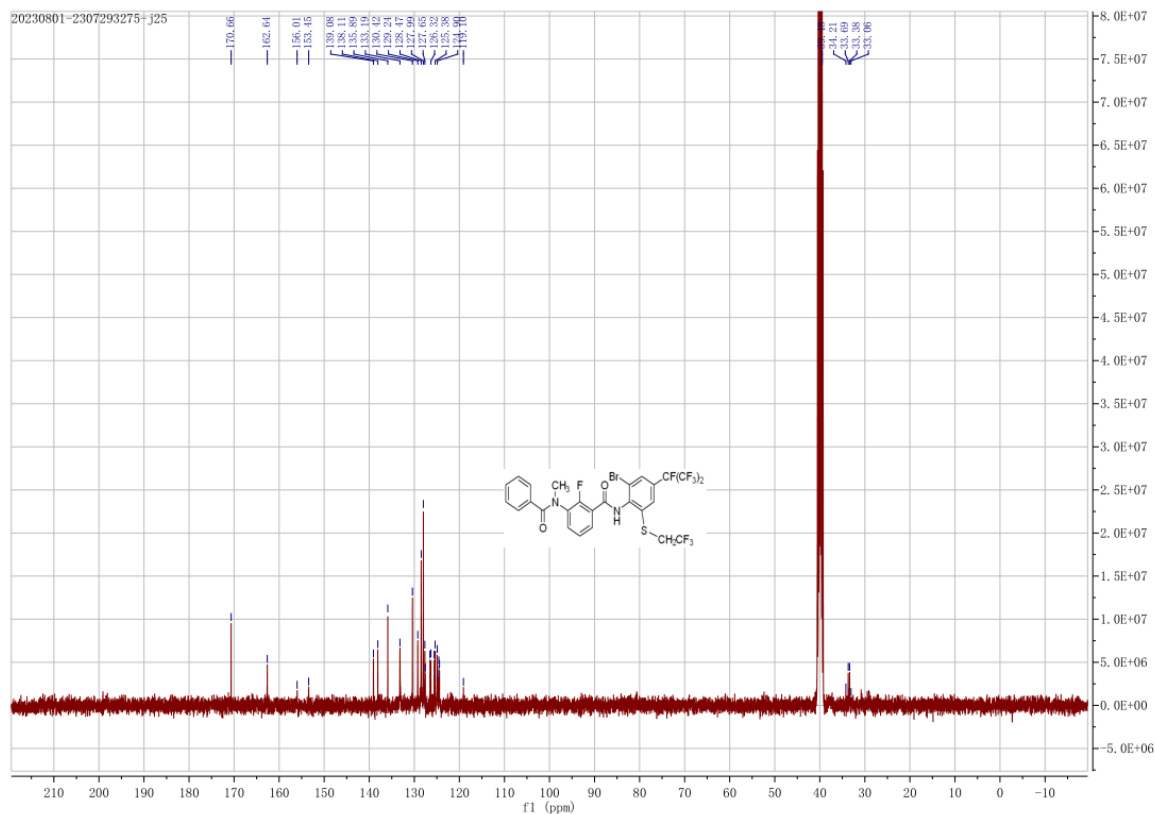

**Figure 17S**  $^{13}\text{C}$  NMR spectrum of **B-3**

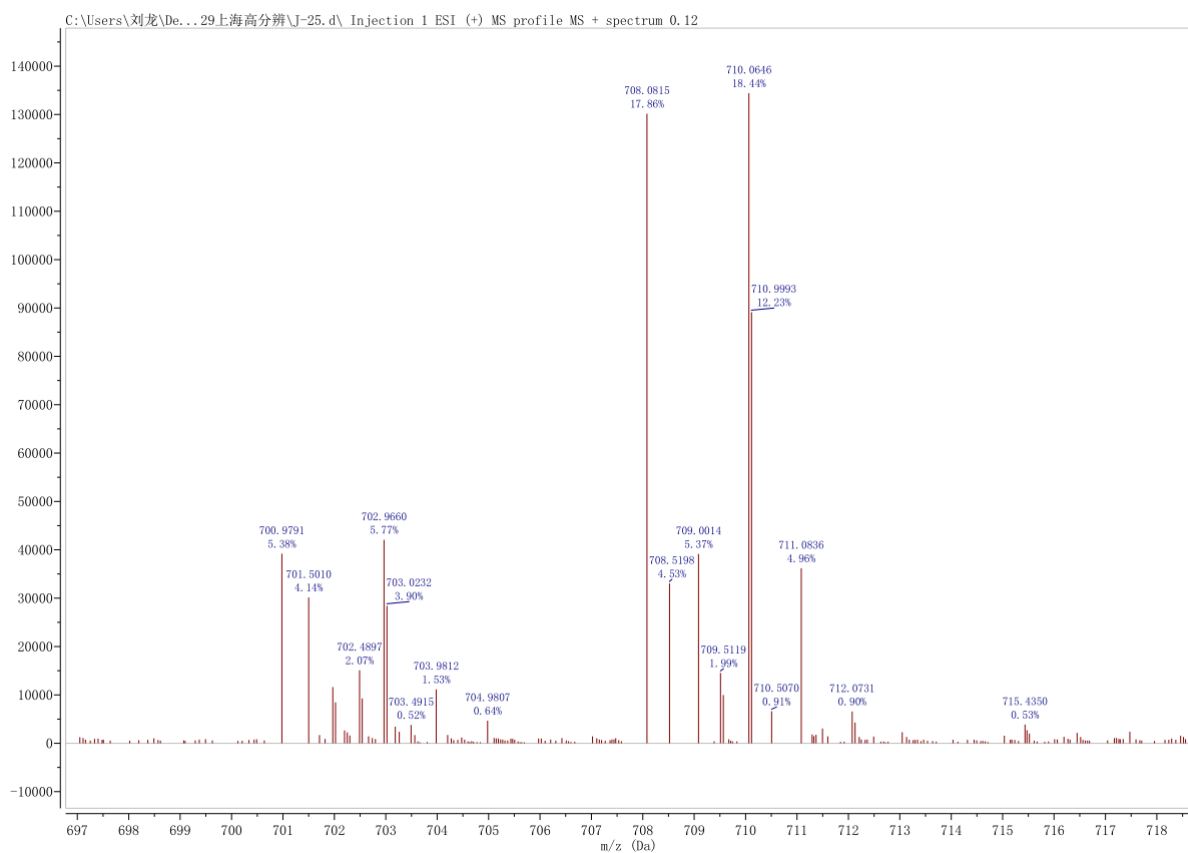

**Figure 18S** HRMS spectrum of **B-3**

**C-1**

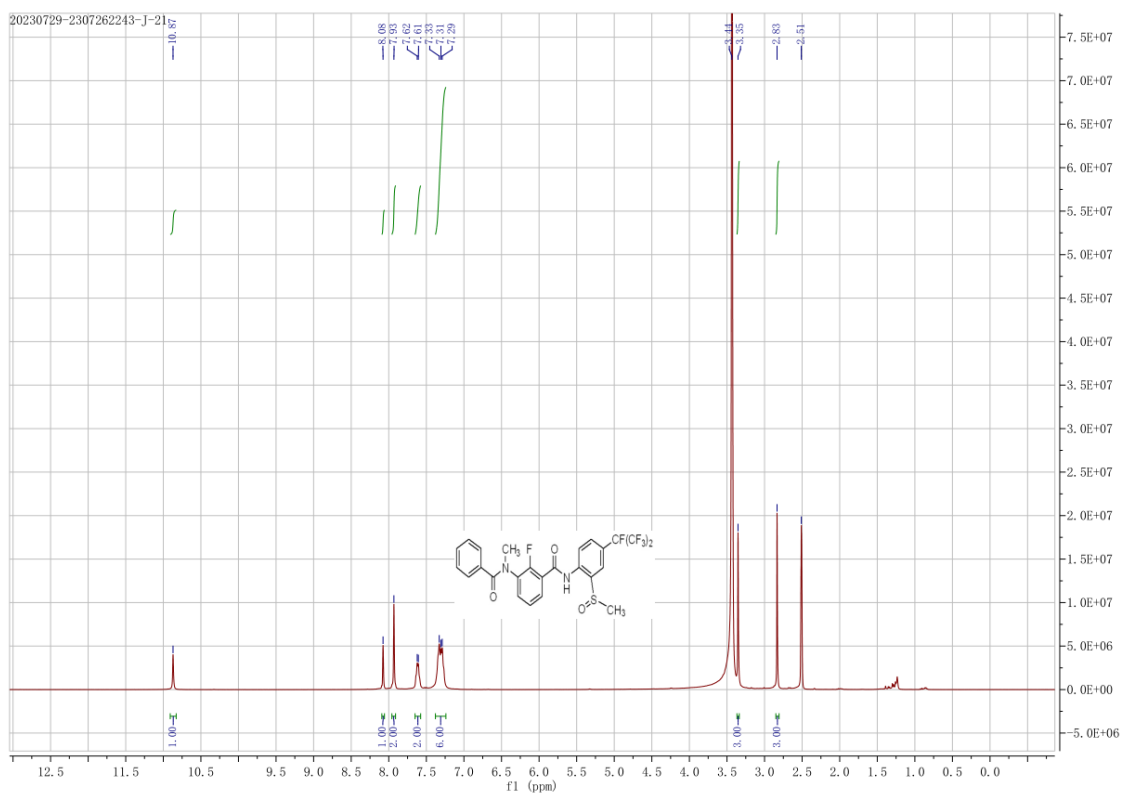

**Figure 19S** <sup>1</sup>H NMR spectrum of **C-1**

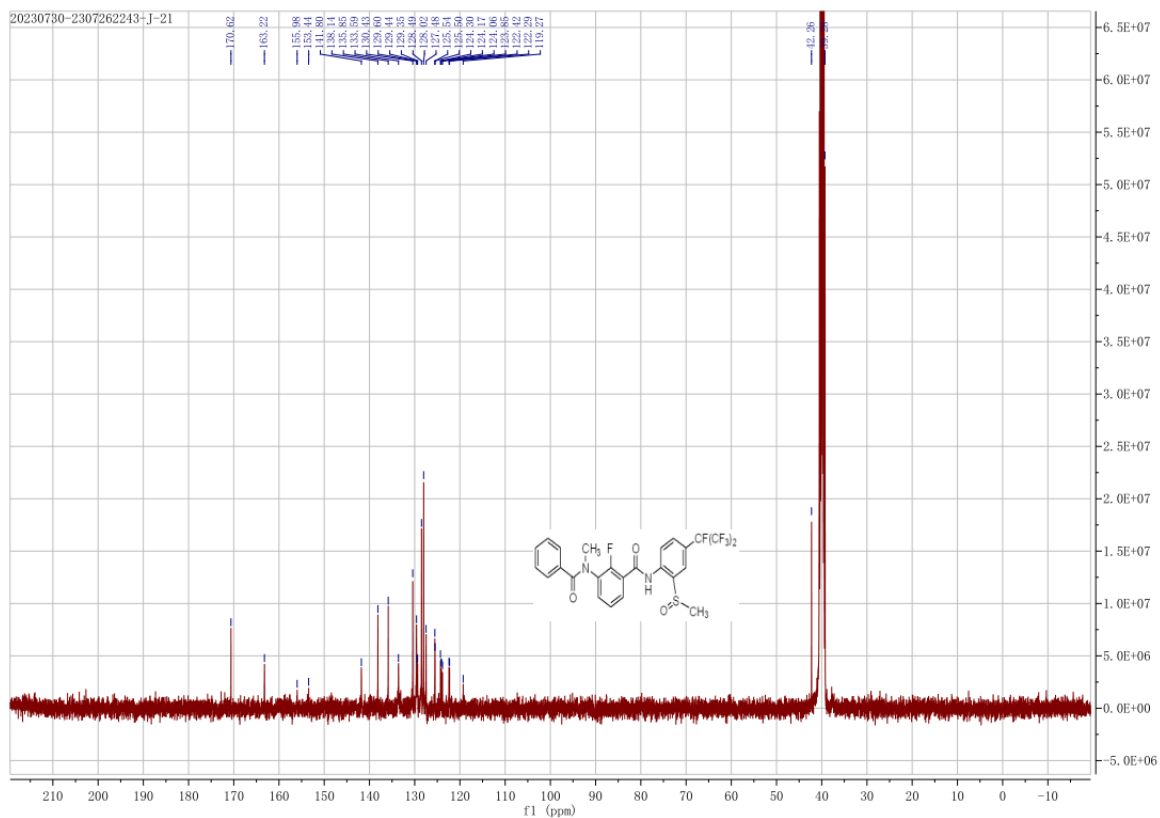

**Figure 20S** <sup>13</sup>C NMR spectrum of **C-1**

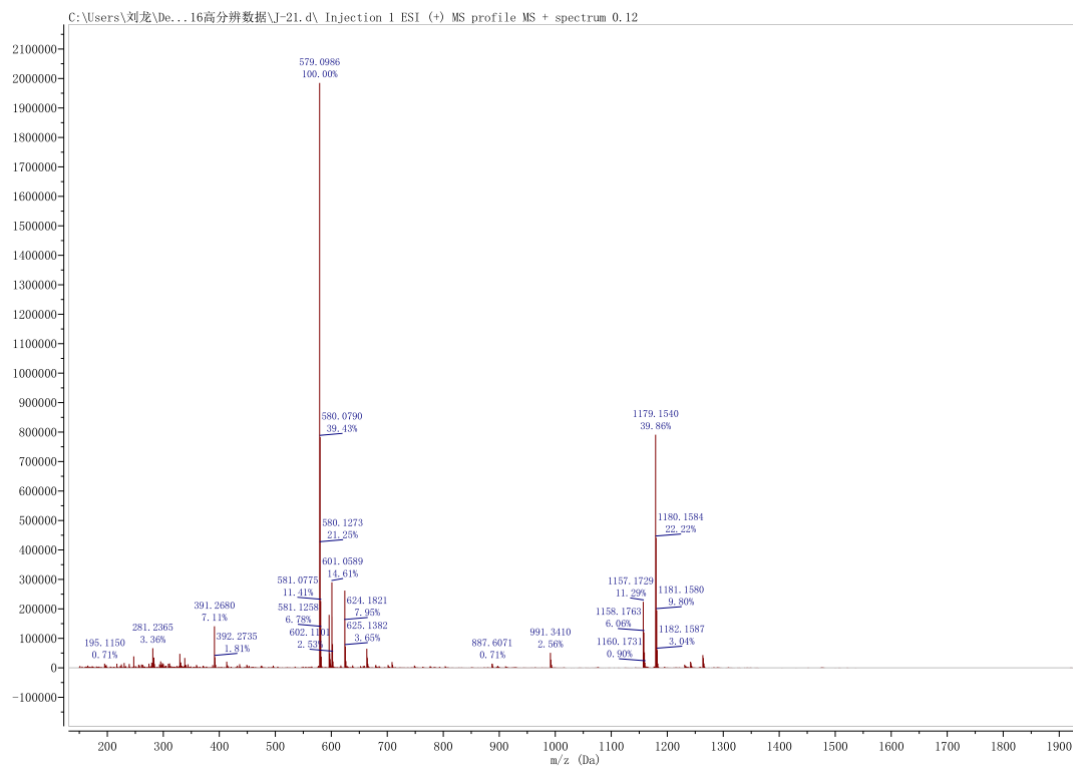

**Figure 21S** HRMS spectrum of **C-1**

**C-2**

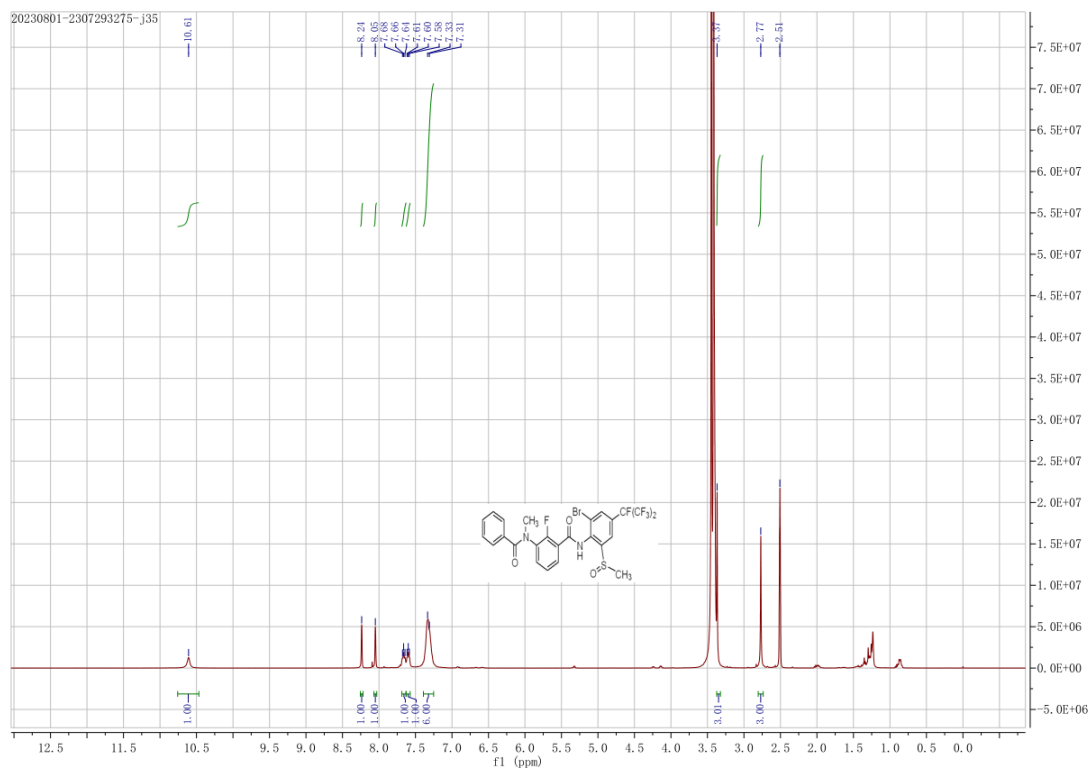

**Figure 22S**  $^1\text{H}$  NMR spectrum of **C-2**

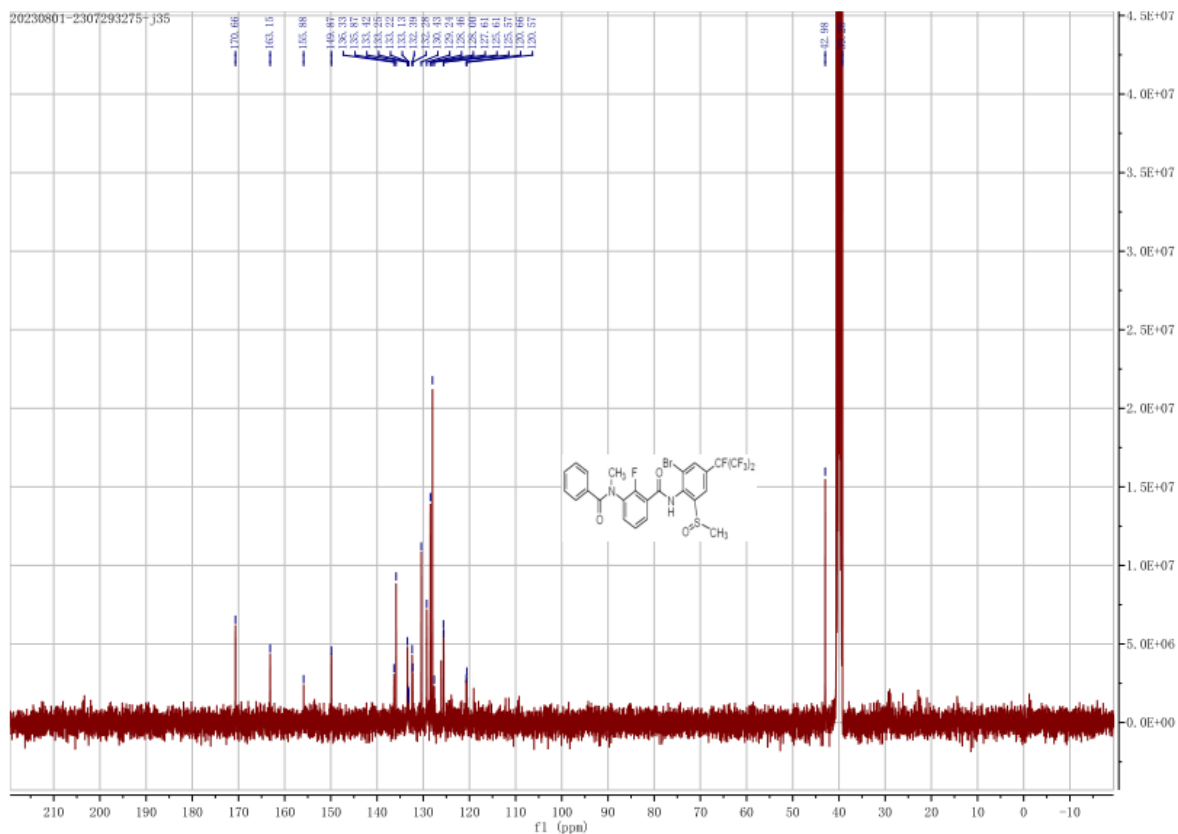

Figure 23S  $^{13}\text{C}$  NMR spectrum of C-2

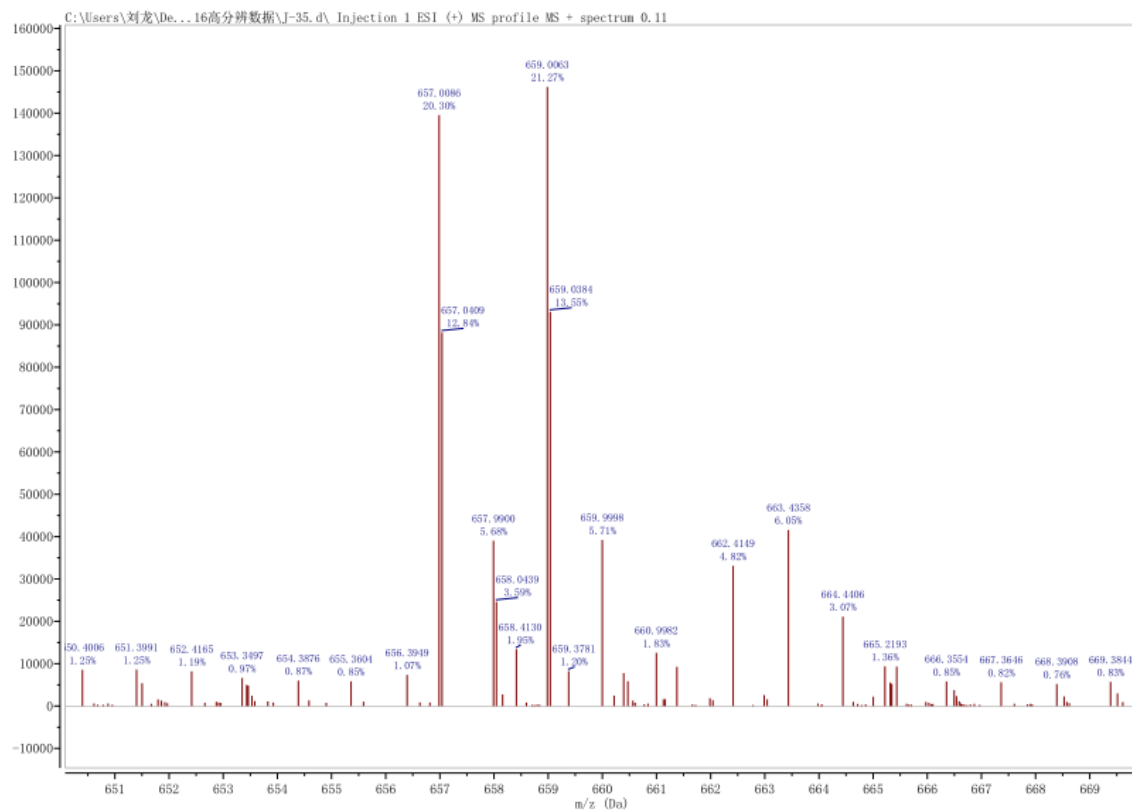

Figure 24 S HRMS spectrum of C-2

# C-3

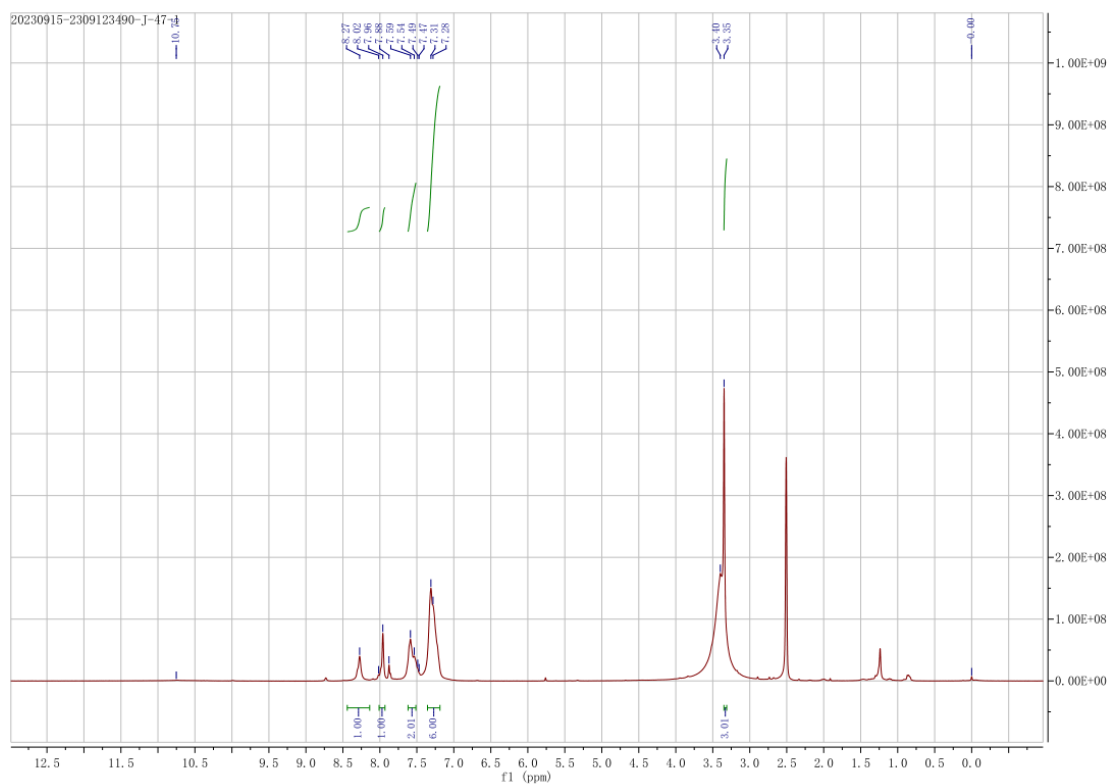

Figure 25S  $^1\text{H}$  NMR spectrum of C-3

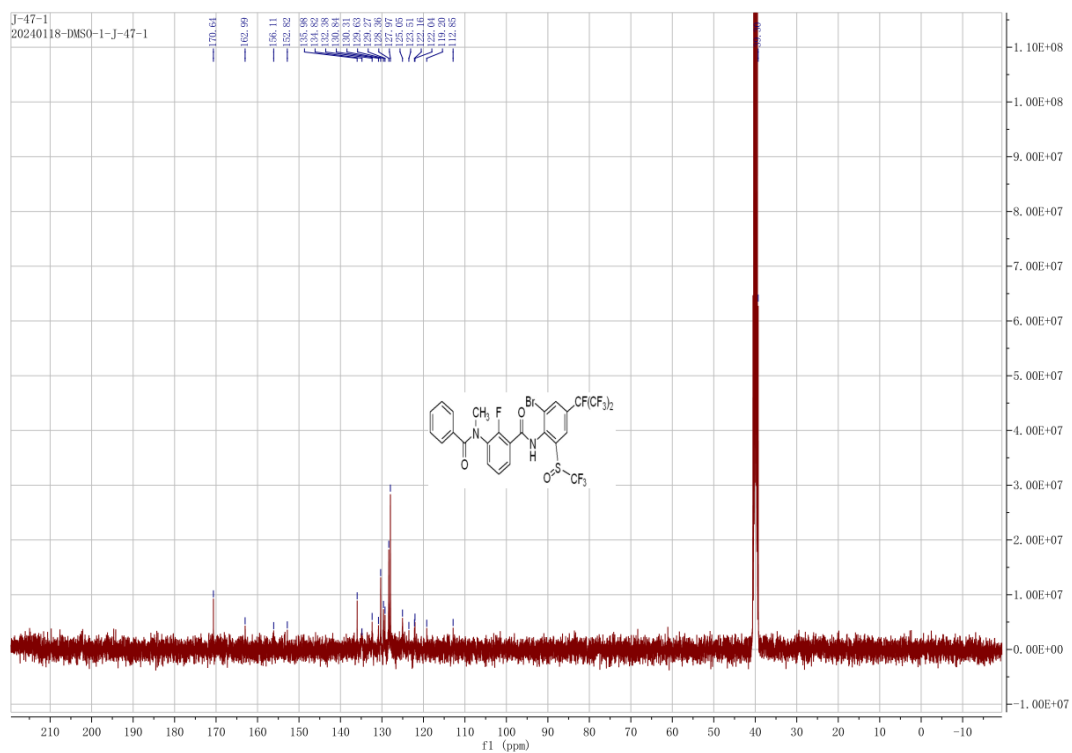

Figure 26S  $^{13}\text{C}$  NMR spectrum of C-3

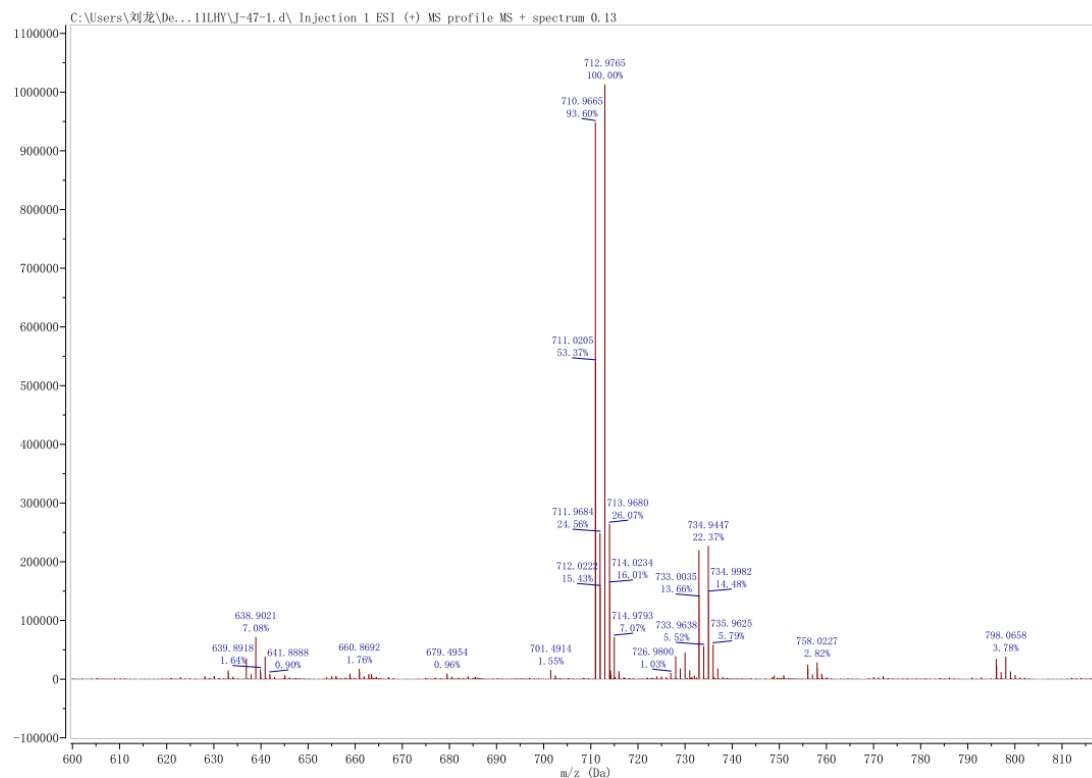

C-4

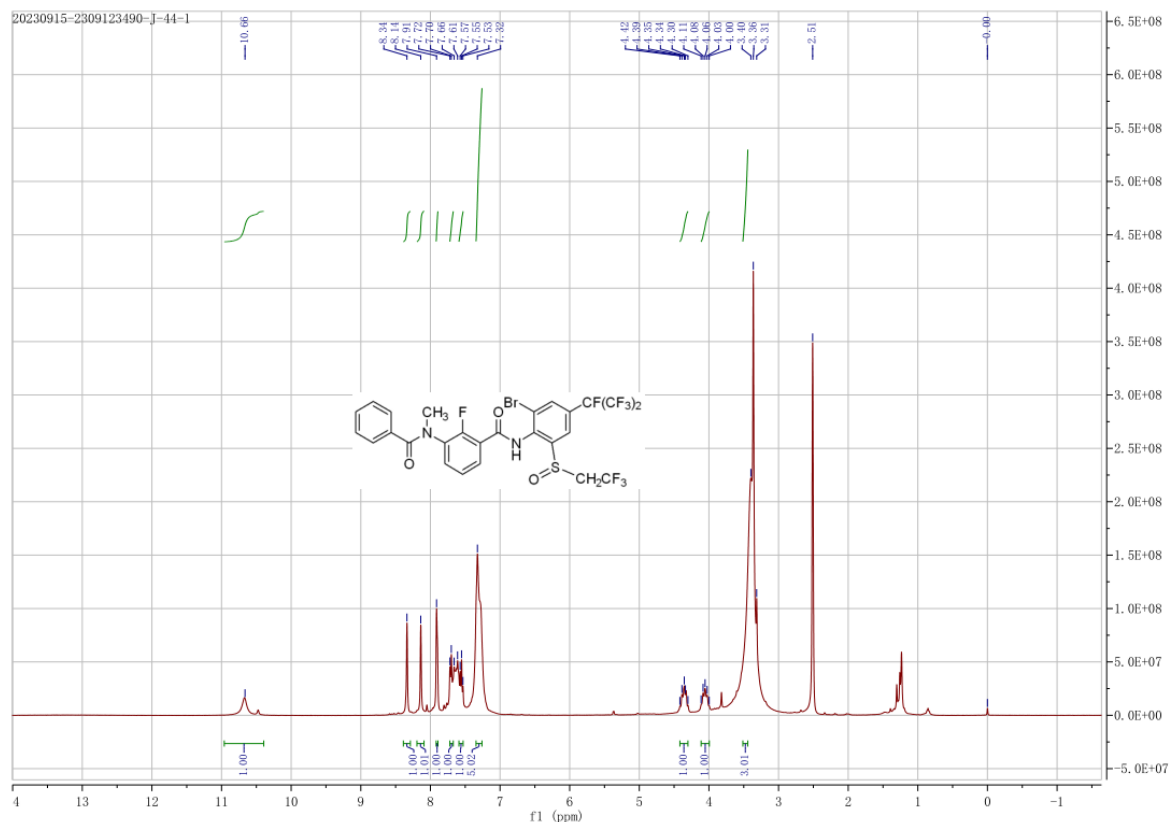

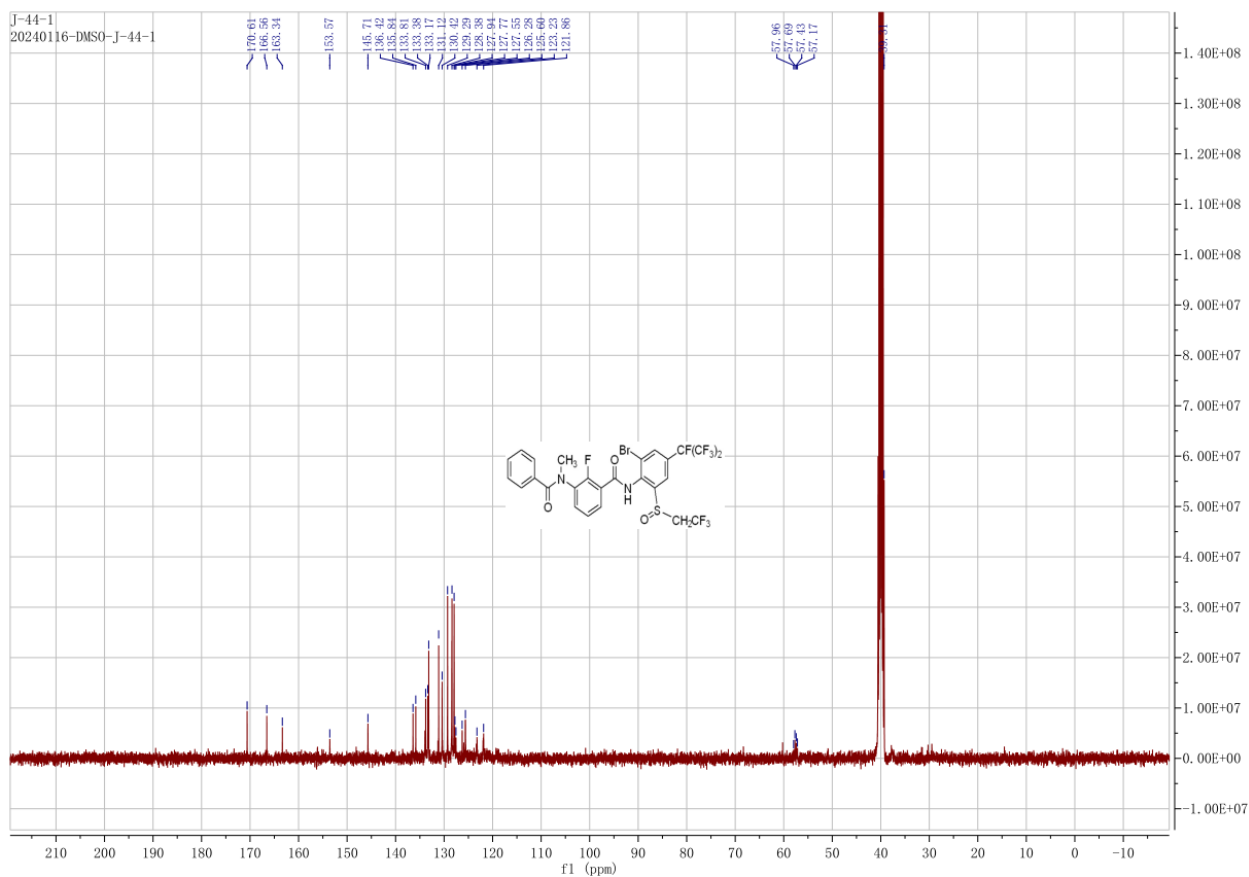

Figure 29S  $^{13}\text{C}$  NMR spectrum of C-4

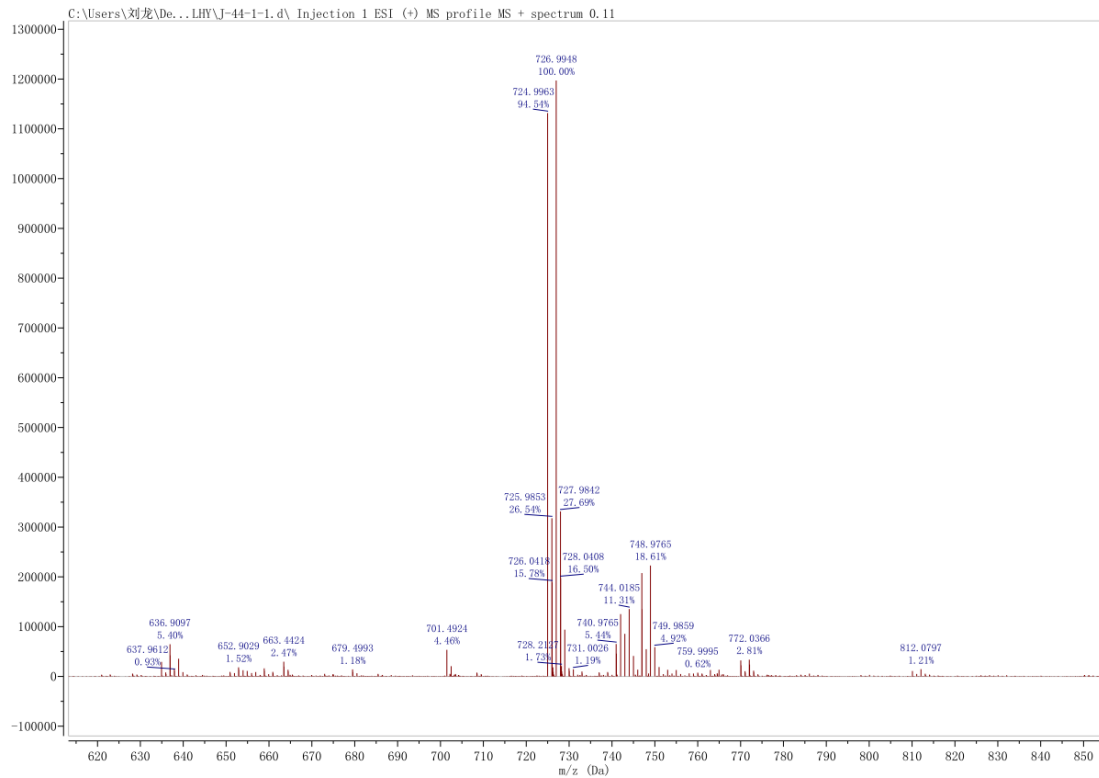

Figure 30S HRMS spectrum of C-4

## D-1

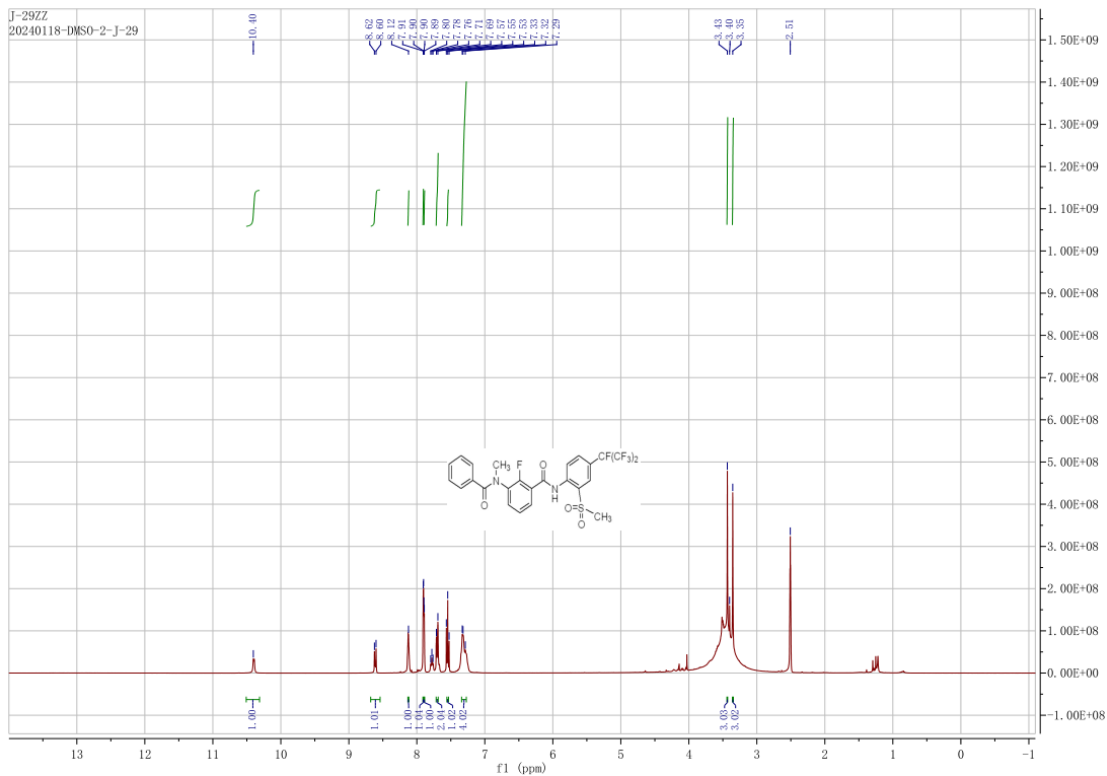

**Figure 31**  $^1\text{H}$  NMR spectrum of **D-1**

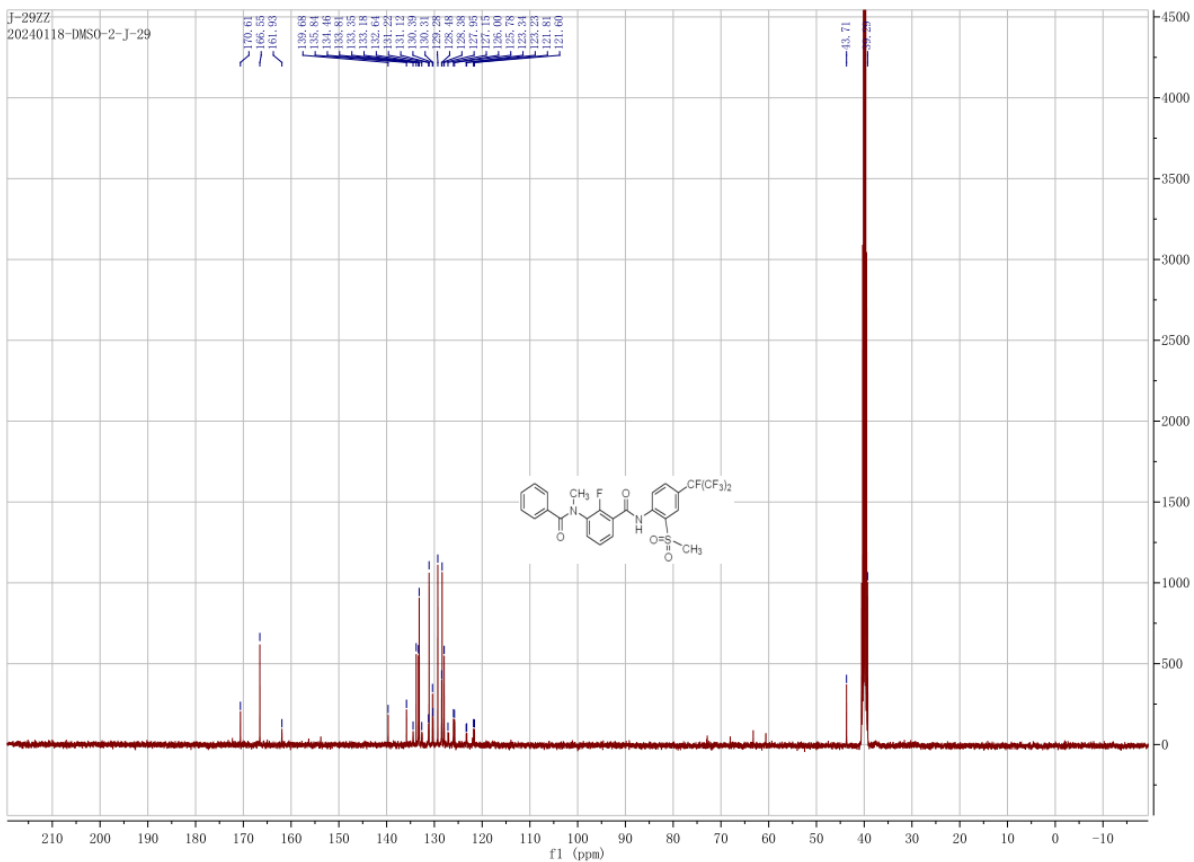

**Figure 32S**  $^{13}\text{C}$  NMR spectrum of **D-1**

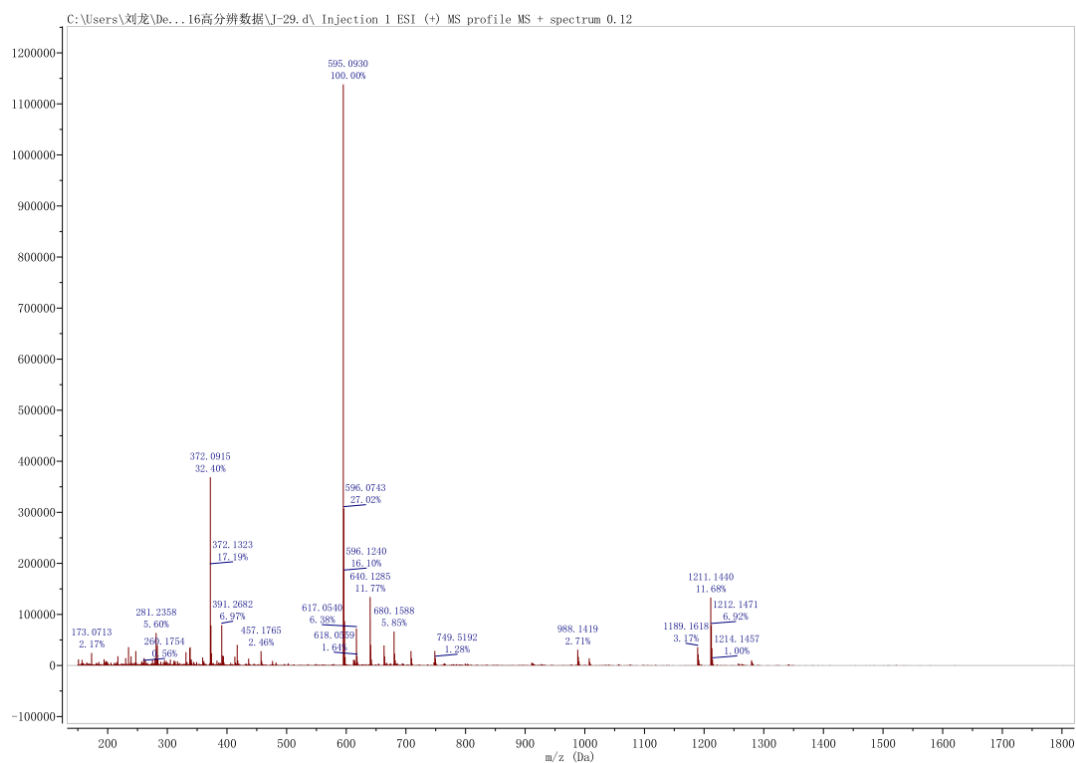

**Figure 33S** HRMS spectrum of **D-1**

**D-2**

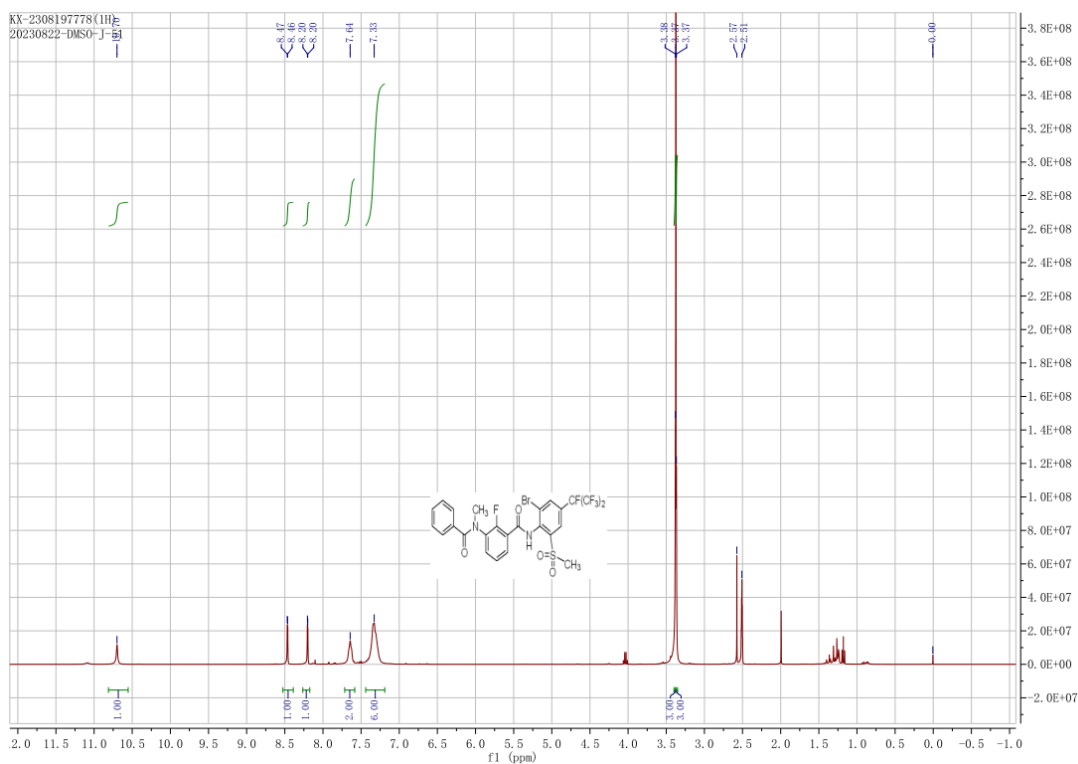

**Figure 34S**  $^1\text{H}$  NMR spectrum of **D-2**

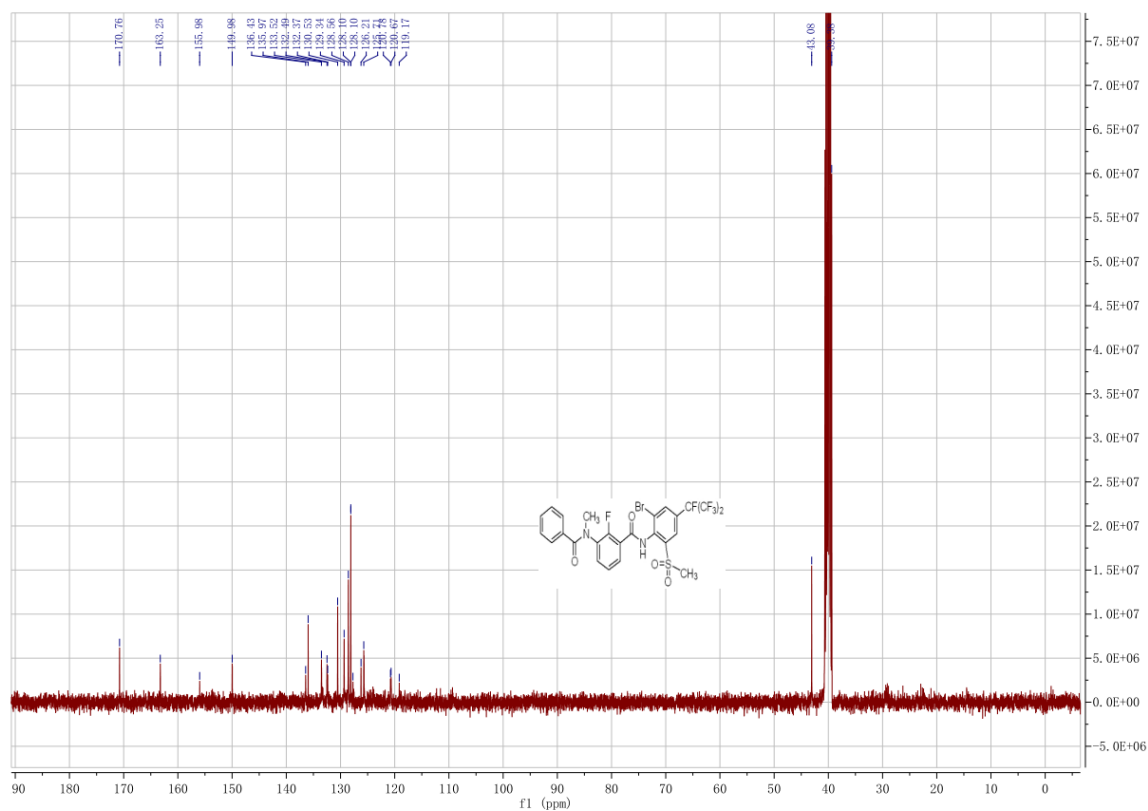

Figure 35S <sup>13</sup>C NMR spectrum of D-2

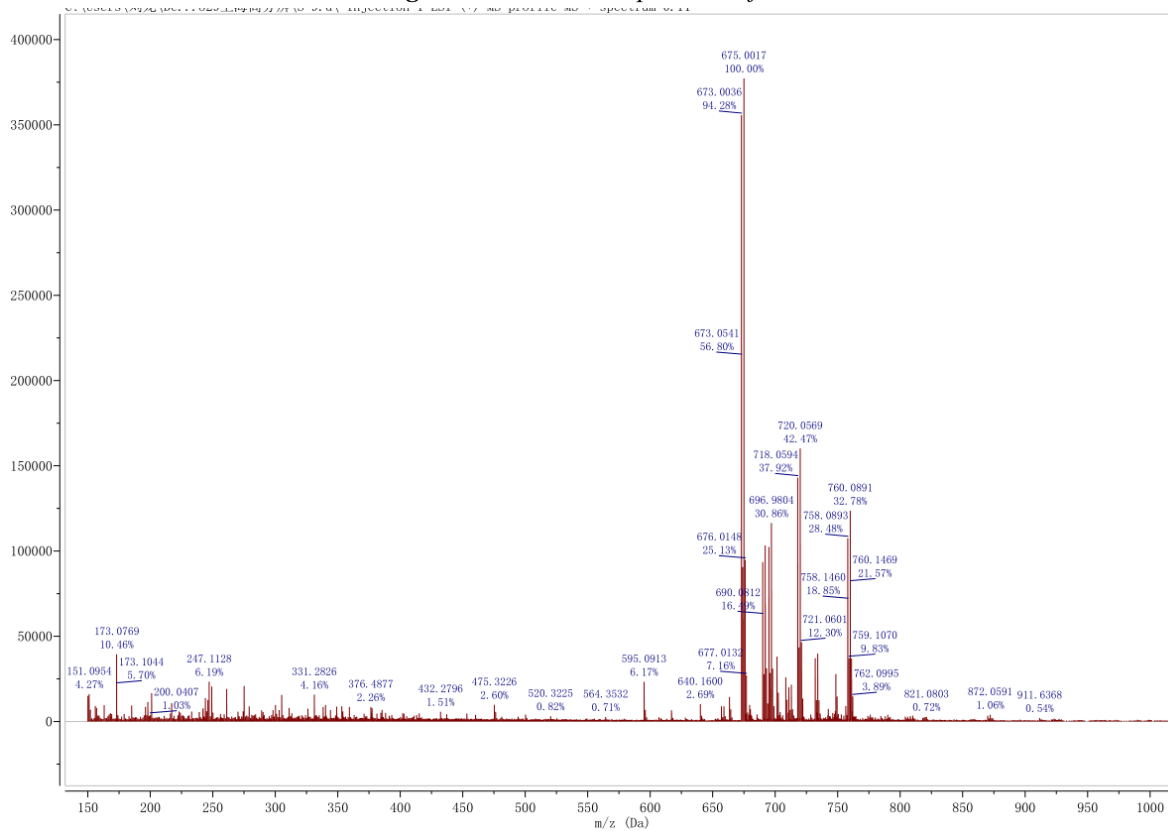

Figure 36S HRMS spectrum of D-2
